# Supplementary material for: Comparative Efficacy and Safety of 11 Drugs as Therapies for Adults With Neuropathic Pain After Spinal Cord Injury: A Bayesian Network Analysis Based on 20 Randomized Controlled Trials
Source: PubMed Central journal article supplement (PMC8977449; doi:10.3389/fneur.2022.818522), 2022-03-21
Supplement: Data_Sheet_1.pdf [file Data_Sheet_1.pdf]

*Supplementary Material*

**Comparative Efficacy and Safety of 11 Drugs as Therapies  
for Adults with Neuropathic Pain after Spinal Cord Injury:  
A Bayesian Network Analysis Based on 20 Randomized  
Controlled Trials**

## 1 PRISMA Checklist

| Section/topic             | # | Checklist item                                                                                                                                                                                                                                                                                              | Reported on page # |
|---------------------------|---|-------------------------------------------------------------------------------------------------------------------------------------------------------------------------------------------------------------------------------------------------------------------------------------------------------------|--------------------|
| <b>TITLE</b>              |   |                                                                                                                                                                                                                                                                                                             |                    |
| Title                     | 1 | Identify the report as a systematic review, meta-analysis, or both.                                                                                                                                                                                                                                         | 1                  |
| <b>ABSTRACT</b>           |   |                                                                                                                                                                                                                                                                                                             |                    |
| Structured summary        | 2 | Provide a structured summary including, as applicable: background; objectives; data sources; study eligibility criteria, participants, and interventions; study appraisal and synthesis methods; results; limitations; conclusions and implications of key findings; systematic review registration number. | 2                  |
| <b>INTRODUCTION</b>       |   |                                                                                                                                                                                                                                                                                                             |                    |
| Rationale                 | 3 | Describe the rationale for the review in the context of what is already known.                                                                                                                                                                                                                              | 2-3                |
| Objectives                | 4 | Provide an explicit statement of questions being addressed with reference to participants, interventions, comparisons, outcomes, and study design (PICOS).                                                                                                                                                  | 3                  |
| <b>METHODS</b>            |   |                                                                                                                                                                                                                                                                                                             |                    |
| Protocol and registration | 5 | Indicate if a review protocol exists, if and where it can be accessed (e.g., Web address), and, if available, provide registration information including registration number.                                                                                                                               | 5-6                |

|                                    |    |                                                                                                                                                                                                                        |     |
|------------------------------------|----|------------------------------------------------------------------------------------------------------------------------------------------------------------------------------------------------------------------------|-----|
| Eligibility criteria               | 6  | Specify study characteristics (e.g., PICOS, length of follow-up) and report characteristics (e.g., years considered, language, publication status) used as criteria for eligibility, giving rationale.                 | 4   |
| Information sources                | 7  | Describe all information sources (e.g., databases with dates of coverage, contact with study authors to identify additional studies) in the search and date last searched.                                             | 3   |
| Search                             | 8  | Present full electronic search strategy for at least one database, including any limits used, such that it could be repeated.                                                                                          | 3   |
| Study selection                    | 9  | State the process for selecting studies (i.e., screening, eligibility, included in systematic review, and, if applicable, included in the meta-analysis).                                                              | 4-5 |
| Data collection process            | 10 | Describe method of data extraction from reports (e.g., piloted forms, independently, in duplicate) and any processes for obtaining and confirming data from investigators.                                             | 4-5 |
| Data items                         | 11 | List and define all variables for which data were sought (e.g., PICOS, funding sources) and any assumptions and simplifications made.                                                                                  | 5   |
| Risk of bias in individual studies | 12 | Describe methods used for assessing risk of bias of individual studies (including specification of whether this was done at the study or outcome level), and how this information is to be used in any data synthesis. | 5   |
| Summary measures                   | 13 | State the principal summary measures (e.g., risk ratio, difference in means).                                                                                                                                          | 5   |
| Synthesis of results               | 14 | Describe the methods of handling data and combining results of studies, if done, including measures of consistency (e.g., I <sup>2</sup> ) for each meta-analysis.                                                     | 5   |
| Risk of bias across studies        | 15 | Specify any assessment of risk of bias that may affect the cumulative evidence (e.g., publication bias, selective reporting within studies).                                                                           | 5   |

|                               |    |                                                                                                                                                                                                          |       |
|-------------------------------|----|----------------------------------------------------------------------------------------------------------------------------------------------------------------------------------------------------------|-------|
| Additional analyses           | 16 | Describe methods of additional analyses (e.g., sensitivity or subgroup analyses, meta-regression), if done, indicating which were pre-specified.                                                         |       |
| <b>RESULTS</b>                |    |                                                                                                                                                                                                          |       |
| Study selection               | 17 | Give numbers of studies screened, assessed for eligibility, and included in the review, with reasons for exclusions at each stage, ideally with a flow diagram.                                          | 10    |
| Study characteristics         | 18 | For each study, present characteristics for which data were extracted (e.g., study size, PICOS, follow-up period) and provide the citations.                                                             | 10    |
| Risk of bias within studies   | 19 | Present data on risk of bias of each study and, if available, any outcome level assessment (see item 12).                                                                                                | 10    |
| Results of individual studies | 20 | For all outcomes considered (benefits or harms), present, for each study: (a) simple summary data for each intervention group (b) effect estimates and confidence intervals, ideally with a forest plot. | 10-11 |
| Synthesis of results          | 21 | Present results of each meta-analysis done, including confidence intervals and measures of consistency.                                                                                                  | 10-11 |
| Risk of bias across studies   | 22 | Present results of any assessment of risk of bias across studies (see Item 15).                                                                                                                          | 10-11 |
| Additional analysis           | 23 | Give results of additional analyses, if done (e.g., sensitivity or subgroup analyses, meta-regression [see Item 16]).                                                                                    |       |
| <b>DISCUSSION</b>             |    |                                                                                                                                                                                                          |       |
| Summary of evidence           | 24 | Summarize the main findings including the strength of evidence for each main outcome; consider their relevance to key groups (e.g., healthcare providers, users, and policy makers).                     | 12-16 |

|                |    |                                                                                                                                                               |       |
|----------------|----|---------------------------------------------------------------------------------------------------------------------------------------------------------------|-------|
| Limitations    | 25 | Discuss limitations at study and outcome level (e.g., risk of bias), and at review-level (e.g., incomplete retrieval of identified research, reporting bias). | 16-17 |
| Conclusions    | 26 | 18                                                                                                                                                            | 17    |
| <b>FUNDING</b> |    |                                                                                                                                                               |       |
| Funding        | 27 | Describe sources of funding for the systematic review and other support (e.g., supply of data); role of funders for the systematic review.                    | 17    |

**Supplementary 0. PRISMA Checklist**



OR "Neuralgia"[All Fields]) OR "Neuralgias"[All Fields]) AND "Ilioinguinal"[Title/Abstract]) OR "ilioinguinal neuralgia"[Title/Abstract]) OR "ilioinguinal neuralgias"[Title/Abstract]) OR (((("Neuralgia"[MeSH Terms] OR "Neuralgia"[All Fields]) OR "Neuralgias"[All Fields]) AND "Ilioinguinal"[Title/Abstract])))) AND ("Therapeutics"[MeSH Terms] OR (((("Therapeutic"[Title/Abstract] OR "Therapy"[Title/Abstract] OR "Therapies"[Title/Abstract] OR "Treatment"[Title/Abstract] OR "Treatments"[Title/Abstract])))) AND ("randomized controlled trial"[Publication Type] OR "randomized"[Title/Abstract] OR "placebo"[Title/Abstract]))

## Supplementary 1. The Search Strategies Used in PubMed

### Search from Embase

Embase®

#### Em base Session Results

| No. | Query                                                                                                                                                                                                                                                                                                                                                                                                                                                                                                                                                                                                                                                                                                                                                                                                                                                                                                                                                                                                                                                                                                                                                                                                                                                                                                                                                                                                                                                  | Results    |
|-----|--------------------------------------------------------------------------------------------------------------------------------------------------------------------------------------------------------------------------------------------------------------------------------------------------------------------------------------------------------------------------------------------------------------------------------------------------------------------------------------------------------------------------------------------------------------------------------------------------------------------------------------------------------------------------------------------------------------------------------------------------------------------------------------------------------------------------------------------------------------------------------------------------------------------------------------------------------------------------------------------------------------------------------------------------------------------------------------------------------------------------------------------------------------------------------------------------------------------------------------------------------------------------------------------------------------------------------------------------------------------------------------------------------------------------------------------------------|------------|
| #11 | #3 AND #6 AND #8 AND #10                                                                                                                                                                                                                                                                                                                                                                                                                                                                                                                                                                                                                                                                                                                                                                                                                                                                                                                                                                                                                                                                                                                                                                                                                                                                                                                                                                                                                               | 232        |
| #10 | 'random ized controlled tria l'ab,ti0R 'random ized'ab,ti0R 'p lacebo'ab,ti0R 'double-blind'ab,ti                                                                                                                                                                                                                                                                                                                                                                                                                                                                                                                                                                                                                                                                                                                                                                                                                                                                                                                                                                                                                                                                                                                                                                                                                                                                                                                                                      | 932,651    |
| #9  | #7 OR #8                                                                                                                                                                                                                                                                                                                                                                                                                                                                                                                                                                                                                                                                                                                                                                                                                                                                                                                                                                                                                                                                                                                                                                                                                                                                                                                                                                                                                                               | 12,981,704 |
| #8  | 'therapeutic'ab,ti0R 'therapy'ab,ti0R 'therapies'ab,ti0R 'treatm ent'ab,ti0R 'treatm ents'ab,ti                                                                                                                                                                                                                                                                                                                                                                                                                                                                                                                                                                                                                                                                                                                                                                                                                                                                                                                                                                                                                                                                                                                                                                                                                                                                                                                                                        | 8,267,155  |
| #7  | 'therapy'/exp                                                                                                                                                                                                                                                                                                                                                                                                                                                                                                                                                                                                                                                                                                                                                                                                                                                                                                                                                                                                                                                                                                                                                                                                                                                                                                                                                                                                                                          | 8,767,244  |
| #6  | #4 OR #5                                                                                                                                                                                                                                                                                                                                                                                                                                                                                                                                                                                                                                                                                                                                                                                                                                                                                                                                                                                                                                                                                                                                                                                                                                                                                                                                                                                                                                               | 116,528    |
| #5  | 'neuralgias'ab,ti0R 'neuropathic pain'ab,ti0R 'neuropathic pains'ab,ti0R 'pain, neuropathic'ab,ti0R 'pains, neuropathic'ab,ti0R 'neurodynia'ab,ti0R 'neurodynias'ab,ti0R 'neuralgia, atypica l'ab,ti0R 'atypica lneuralgia'ab,ti0R 'atypica lneuralgias'ab,ti0R 'neuralgias, atypica l'ab,ti0R 'neuralgia, iliohypogastric nerve'ab,ti0R 'iliohypogastric nerve'neuralgia'ab,ti0R 'iliohypogastric nerve neuralgias'ab,ti0R 'nerve'neuralgia, iliohypogastric'ab,ti0R 'nerve neuralgias, iliohypogastric'ab,ti0R 'neuralgias, iliohypogastric nerve'ab,ti0R 'paroxysm al nerve pain'ab,ti0R 'nerve pain, paroxysm al'ab,ti0R 'nerve pains, paroxysm al'ab,ti0R 'pain, paroxysm al nerve'ab,ti0R 'pains, paroxysm al nerve'ab,ti0R 'paroxysm al nerve pains'ab,ti0R 'neuralgia, perinea l'ab,ti0R 'neuralgias, perinea l'ab,ti0R 'perinea lneuralgia'ab,ti0R 'neuralgia, stum p'ab,ti0R 'neuralgias, stum p'ab,ti0R 'stum p'neuralgia'ab,ti0R 'stum p neura lgias'ab,ti0R 'neuralgia, supraorbita l'ab,ti0R 'neuralgias, supraorbita l'ab,ti0R 'supraorbita lneuralgia'ab,ti0R 'supraorbita lneuralgias'ab,ti0R 'neuralgia, vidian'ab,ti0R 'neuralgias, vidian'ab,ti0R 'vidian'neuralgia'ab,ti0R 'vidian neuralgias'ab,ti0R 'nerve pain'ab,ti0R 'nerve pains'ab,ti0R 'pain, nerve'ab,ti0R 'pains, nerve'ab,ti0R 'neuralgia, ilio inguina l'ab,ti0R 'ilio inguina lneuralgia'ab,ti0R 'ilio inguina lneuralgias'ab,ti0R 'neuralgias, ilio inguina l'ab,ti | 30,546     |
| #4  | 'neuralgia'/exp                                                                                                                                                                                                                                                                                                                                                                                                                                                                                                                                                                                                                                                                                                                                                                                                                                                                                                                                                                                                                                                                                                                                                                                                                                                                                                                                                                                                                                        | 110,109    |
| #3  | #1 OR #2                                                                                                                                                                                                                                                                                                                                                                                                                                                                                                                                                                                                                                                                                                                                                                                                                                                                                                                                                                                                                                                                                                                                                                                                                                                                                                                                                                                                                                               | 84,083     |
| #2  | 'spinalcord traum a'ab,ti0R 'cord traum a, spina l'ab,ti0R 'cord traum as, spina l'ab,ti0R 'spinalcord traum as'ab,ti0R 'traum a, spina l'ab,ti0R 'traum as, spina l'ab,ti0R 'm yelopathy, traum atic'ab,ti0R 'm yelopathies, traum atic'ab,ti0R 'traum atic m yelopathies'ab,ti0R 'traum atic m yelopathy'ab,ti0R 'injuries, spina l'ab,ti0R 'cord injuries, spina l'ab,ti0R 'cord injury, spina l'ab,ti0R 'injury, spina l'ab,ti0R 'spinalcord injury'ab,ti0R 'spinalcord transection'ab,ti0R 'cord transection, spina l'ab,ti0R 'cord transections, spina l'ab,ti0R 'spinalcord transections'ab,ti0R 'transection, spina l'ab,ti0R 'transections, spina l'ab,ti0R 'spinalcord laceration'ab,ti0R 'cord laceration, spina l'ab,ti0R 'cord lacerations, spina l'ab,ti0R 'laceration, spina l'ab,ti0R 'lacerations, spina l'ab,ti0R 'spinalcord lacerations'ab,ti0R 'post-traum atic m yelopathy'ab,ti0R 'm yelopathies, post-traum atic'ab,ti0R 'm yelopathy, post-traum atic'ab,ti0R 'post traum atic m yelopathy'ab,ti0R 'post-traum atic m yelopathies'ab,ti0R 'spinalcord contusion'ab,ti0R 'contusion, spina l'ab,ti0R 'contusions, spina l'ab,ti0R 'cord contusion, spina l'ab,ti0R 'cord contusions, spina l'ab,ti0R 'spinalcord contusions'ab,ti                                                                                                                                                                                              | 46,287     |
| #1  | 'spinalcord injury'/exp                                                                                                                                                                                                                                                                                                                                                                                                                                                                                                                                                                                                                                                                                                                                                                                                                                                                                                                                                                                                                                                                                                                                                                                                                                                                                                                                                                                                                                | 78,598     |

ELSEVIER

© 2020 RELX Intellectual Properties SA. All rights reserved.

Em base, RELX Group and the RE sym bolare trade m arks of RELX Intellectual Properties SA, used under license.

## Supplementary 2. The Search Strategies Used in Embase.

**Supplementary Table 1.** Primary Outcome - Pain Relief for Almost 4 Weeks.

| <b>Primary outcomes-efficacy<br/>(pain relief) [almost 4 weeks]</b> | <b>ID</b> | <b>Treatment</b> | <b>n</b> | <b>Mean<br/>change</b> | <b>sd</b> |
|---------------------------------------------------------------------|-----------|------------------|----------|------------------------|-----------|
| Nct2012                                                             | 2         | cannabinoids     | 55       | -0.74                  | 1.12      |
|                                                                     | 1         | placebo          | 59       | -0.69                  | 1.39      |
| Cardenas2013                                                        | 3         | pregabalin       | 107      | -1.64                  | 1.61      |
|                                                                     | 1         | placebo          | 103      | -1.03                  | 1.53      |
| Agarwal2017                                                         | 4         | amitriptyline    | 74       | -0.43                  | 0.18      |
|                                                                     | 5         | lamotrigine      | 73       | -0.44                  | 0.21      |
| Amr2010                                                             | 6         | ketamine         | 20       | -42.2                  | 4.4       |
|                                                                     | 7         | gabapentin       | 20       | -43.5                  | 2.3       |
| Amr2011                                                             | 6         | ketamine         | 20       | -48.3                  | 9.23      |
|                                                                     | 7         | gabapentin       | 20       | -32.15                 | 9.95      |
| Andresen2016                                                        | 2         | cannabinoids     | 34       | -0.4                   | 1.51      |
|                                                                     | 1         | placebo          | 34       | -0.7                   | 1.57      |
| Salinas2012                                                         | 8         | carbamazepine    | 23       | -14.7                  | 31.59     |
|                                                                     | 1         | placebo          | 21       | -14.5                  | 31.9      |
| Siddall2006                                                         | 3         | pregabalin       | 69       | -1.92                  | 1.84      |
|                                                                     | 1         | placebo          | 67       | -0.46                  | 1.85      |
| Tai2016                                                             | 7         | gabapentin       | 7        | -0.4                   | 3.12      |
|                                                                     | 1         | placebo          | 7        | 2.3                    | 4.4       |
| Vranken2008                                                         | 3         | pregabalin       | 17       | -2.5                   | 2.59      |



---

|                |    |               |    |       |       |
|----------------|----|---------------|----|-------|-------|
|                | 1  | placebo       | 16 | -0.1  | 1.73  |
| Vranken2011    | 9  | duloxetine    | 18 | -2.1  | 1.74  |
|                | 1  | placebo       | 18 | -1.1  | 1.47  |
| Yilmaz2015     | 3  | pregabalin    | 15 | -3.22 | 2.95  |
|                | 7  | gabapentin    | 15 | -2.25 | 2.41  |
| chun2019       | 10 | BTXA          | 5  | -18.6 | 16.8  |
|                | 1  | placebo       | 3  | -2.6  | 14.6  |
| Finnerup2009   | 11 | levetiracetam | 34 | 0     | 4.36  |
|                | 1  | placebo       | 32 | 1     | 4.12  |
| Han2016        | 10 | BTXA          | 20 | -18.6 | 18.22 |
|                | 1  | placebo       | 20 | 3.4   | 15.1  |
| Kaydok2014     | 7  | gabapentin    | 21 | -4.21 | 1.24  |
|                | 3  | pregabalin    | 19 | -4.69 | 1.19  |
| Levendoglu2004 | 7  | gabapentin    | 20 | -3.7  | 1.01  |
|                | 1  | placebo       | 20 | -0.7  | 3.72  |
| Norrbrink2009  | 12 | tramadol      | 23 | -1    | 2.32  |
|                | 1  | placebo       | 12 | -0.25 | 1.58  |
| Rintala2007    | 4  | amitriptyline | 28 | -2.14 | 2.15  |
|                | 7  | gabapentin    | 26 | -0.75 | 2.59  |
|                | 1  | placebo       | 25 | -0.49 | 2.39  |
| Rintala2010    | 2  | cannabinoids  | 7  | -0.2  | 0.67  |

---

---

|   |         |   |       |      |
|---|---------|---|-------|------|
| 1 | placebo | 5 | -0.14 | 1.25 |
|---|---------|---|-------|------|

---

**Supplementary Table 2.** Primary Outcome - Any Adverse Events.

| <b>Primary outcomes - safety<br/>(any adverse events)</b> | <b>ID</b> | <b>Treatment</b> | <b>n</b> | <b>r</b> |
|-----------------------------------------------------------|-----------|------------------|----------|----------|
| Nct2012                                                   | 2         | cannabinoids     | 56       | 46       |
|                                                           | 1         | placebo          | 60       | 29       |
| Cardenas2013                                              | 3         | pregabalin       | 112      | 78       |
|                                                           | 1         | placebo          | 107      | 56       |
| Agarwal2017                                               | 4         | amitriptyline    | 74       | 10       |
|                                                           | 5         | lamotrigine      | 73       | 0        |
| Amr2010                                                   | 6         | ketamine         | 20       | 8        |
|                                                           | 7         | gabapentin       | 20       | 2        |
| Amr2011                                                   | 6         | ketamine         | 20       | 0        |
|                                                           | 7         | gabapentin       | 20       | 6        |
| Andresen2016                                              | 2         | cannabinoids     | 34       | 7        |
|                                                           | 1         | placebo          | 34       | 2        |
| Salinas2012                                               | 8         | carbamazepine    | 23       | 11       |
|                                                           | 1         | placebo          | 21       | 5        |
| Siddall2006                                               | 3         | pregabalin       | 70       | 67       |
|                                                           | 1         | placebo          | 67       | 50       |
| Tai2016                                                   | 7         | gabapentin       | 7        | 1        |

---

---

|                |    |               |    |    |
|----------------|----|---------------|----|----|
|                | 1  | placebo       | 7  | 0  |
| Vranken2008    | 3  | pregabalin    | 17 | 2  |
|                | 1  | placebo       | 16 | 2  |
| Vranken2011    | 9  | duloxetine    | 18 | 12 |
|                | 1  | placebo       | 18 | 2  |
| Yilmaz2015     | 3  | pregabalin    | 15 | 2  |
|                | 7  | gabapentin    | 15 | 0  |
| chun2019       | 10 | BTX-A         | 6  | 1  |
|                | 1  | placebo       | 6  | 0  |
| Finnerup2009   | 11 | Levetiracetam | 34 | 14 |
|                | 1  | placebo       | 32 | 11 |
| Han2016        | 10 | BTX-A         | 20 | 8  |
|                | 1  | placebo       | 20 | 9  |
| Kaydok2014     | 7  | gabapentin    | 24 | 16 |
|                | 3  | pregabalin    | 25 | 21 |
| Levendoglu2004 | 7  | gabapentin    | 20 | 13 |
|                | 1  | placebo       | 20 | 5  |
| Norrbrink2009  | 12 | tramadol      | 23 | 21 |
|                | 1  | placebo       | 12 | 7  |
| Rintala2007    | 4  | amitriptyline | 28 | 10 |
|                | 7  | gabapentin    | 26 | 9  |

---

|             |   |              |    |   |
|-------------|---|--------------|----|---|
|             | 1 | placebo      | 25 | 8 |
| Rintala2010 | 2 | cannabinoids | 7  | 5 |
|             | 1 | placebo      | 5  | 5 |

**Supplementary Table 3.** Secondary Outcome - Pain Relief for More Than 8 Weeks.

| Primary outcomes-efficacy<br>(pain relief) [more than 8<br>weeks) | ID | Treatment     | n  | Mean change | sd    |
|-------------------------------------------------------------------|----|---------------|----|-------------|-------|
| Cardenas2013                                                      | 2  | pregabalin    | 89 | -2.17       | 1.78  |
|                                                                   | 1  | placebo       | 90 | -1.36       | 1.87  |
| Amr2011                                                           | 3  | ketamine      | 20 | -32.2       | 8.94  |
|                                                                   | 4  | gabapentin    | 20 | -28.95      | 10.14 |
| Andresen2016                                                      | 5  | cannabinoids  | 34 | -0.4        | 1.51  |
|                                                                   | 1  | Placebo       | 34 | -0.7        | 1.57  |
| Salinas2012                                                       | 6  | carbamazepine | 23 | -8.4        | 33.45 |
|                                                                   | 1  | placebo       | 20 | -5          | 29.67 |
| Siddall2006                                                       | 2  | pregabalin    | 69 | -1.92       | 1.84  |
|                                                                   | 1  | placebo       | 67 | -0.46       | 1.85  |
| Vranken2011                                                       | 7  | duloxetine    | 18 | -2.1        | 1.74  |
|                                                                   | 1  | placebo       | 18 | -1.1        | 1.47  |
| Yilmaz2015                                                        | 2  | pregabalin    | 10 | -4.89       | 1.84  |
|                                                                   | 4  | gabapentin    | 11 | -3.6        | 1.38  |

|                |   |               |    |       |       |
|----------------|---|---------------|----|-------|-------|
| chun2019       | 8 | BTX-A         | 6  | -1.67 | 2.59  |
|                | 1 | placebo       | 6  | -1    | 0.95  |
| Han2016        | 8 | BTX-A         | 20 | -21.3 | 23.82 |
|                | 1 | placebo       | 20 | 5.7   | 18.07 |
| Levendoglu2004 | 4 | gabapentin    | 20 | -5.3  | 1.08  |
|                | 1 | placebo       | 20 | -0.5  | 3.76  |
| Rintala2007    | 9 | amitriptyline | 28 | -2.14 | 2.15  |
|                | 4 | gabapentin    | 26 | -0.75 | 2.59  |
|                | 1 | placebo       | 25 | -0.49 | 2.39  |

**Supplementary Table 4.** Secondary Outcome - Mental or Sleep-Related Symptom Relief.

| <b>Secondary outcomes - efficacy (mental or sleep-related symptom relief)</b> | <b>ID</b> | <b>Treatment</b> | <b>n</b> | <b>mean change</b> | <b>sd</b> |
|-------------------------------------------------------------------------------|-----------|------------------|----------|--------------------|-----------|
| Nct2012                                                                       | 2         | cannabinoids     | 55       | -0.41              | 0.59      |
|                                                                               | 1         | placebo          | 59       | -0.38              | 0.73      |
| Cardenas2013                                                                  | 3         | pregabalin       | 105      | -10.8              | 16.7      |
|                                                                               | 1         | placebo          | 106      | -5.8               | 16.21     |
| Salinas2012                                                                   | 4         | carbamazepine    | 23       | -19.7              | 39.12     |
|                                                                               | 1         | placebo          | 21       | -27.6              | 44.64     |
| Siddall2006                                                                   | 3         | pregabalin       | 69       | -8.8               | 19.09     |
|                                                                               | 1         | placebo          | 67       | -5.4               | 20.29     |
| Vranken2008                                                                   | 3         | pregabalin       | 17       | -4.2               | 14.13     |

|                |   |               |    |       |       |
|----------------|---|---------------|----|-------|-------|
|                | 1 | placebo       | 16 | 1.6   | 14.75 |
| Vranken2011    | 5 | duloxetine    | 18 | -5    | 11.73 |
|                | 1 | placebo       | 18 | -2    | 13.83 |
| Yilmaz2015     | 3 | pregabalin    | 15 | -2.81 | 16.06 |
|                | 6 | gabapentin    | 15 | -8.36 | 21.57 |
| Chun2019       | 7 | BTX-A         | 6  | -1.34 | 3.05  |
|                | 1 | placebo       | 6  | 0.67  | 3.19  |
| Finnerup2009   | 8 | levetiracetam | 25 | -1    | 6.33  |
|                | 1 | placebo       | 29 | -0.5  | 6.33  |
| Han2016        | 7 | BTX-A         | 20 | -0.9  | 3.68  |
|                | 1 | placebo       | 20 | 1     | 3.2   |
| Kaydok2014     | 6 | gabapentin    | 21 | -3.79 | 1.72  |
|                | 3 | pregabalin    | 19 | -3.84 | 1.44  |
| Levendoglu2004 | 6 | gabapentin    | 20 | -0.56 | 0.17  |
|                | 1 | placebo       | 20 | -0.13 | 0.5   |
| Norrbrink2009  | 9 | tramadol      | 23 | -1    | 5.19  |
|                | 1 | placebo       | 12 | 0     | 5.11  |

**Supplementary Table 5.** Secondary Outcome - Serious Adverse Events.

| Secondary outcomes - safety<br>[serious adverse events (SAE)] | ID | Treatment    | n  | r |
|---------------------------------------------------------------|----|--------------|----|---|
| Nct2012                                                       | 2  | cannabinoids | 56 | 3 |

---

|              |   |               |     |    |
|--------------|---|---------------|-----|----|
|              | 1 | placebo       | 60  | 2  |
| Cardenas2013 | 3 | pregabalin    | 112 | 9  |
|              | 1 | placebo       | 107 | 10 |
| Agarwal2017  | 4 | amitriptyline | 74  | 0  |
|              | 5 | lamotrigine   | 73  | 0  |
| Amr2010      | 6 | ketamine      | 20  | 0  |
|              | 7 | gabapentin    | 20  | 0  |
| Amr2011      | 6 | ketamine      | 20  | 0  |
|              | 7 | gabapentin    | 20  | 0  |
| Andresen2016 | 2 | cannabinoids  | 34  | 4  |
|              | 1 | placebo       | 34  | 2  |
| Salinas2012  | 8 | carbamazepine | 23  | 0  |
|              | 1 | placebo       | 21  | 0  |
| Siddall2006  | 3 | pregabalin    | 70  | 2  |
|              | 1 | placebo       | 67  | 0  |
| Vranken2008  | 3 | pregabalin    | 17  | 0  |
|              | 1 | placebo       | 16  | 0  |
| Vranken2011  | 9 | duloxetine    | 18  | 0  |
|              | 1 | placebo       | 18  | 0  |
| Yilmaz2015   | 3 | pregabalin    | 15  | 0  |
|              | 7 | gabapentin    | 15  | 0  |

---

---

|                |    |               |    |    |
|----------------|----|---------------|----|----|
| chun2019       | 10 | BTX-A         | 6  | 0  |
|                | 1  | placebo       | 6  | 0  |
| Finnerup2009   | 11 | levetiracetam | 34 | 9  |
|                | 1  | placebo       | 32 | 4  |
| Han2016        | 10 | BTX-A         | 20 | 0  |
|                | 1  | placebo       | 20 | 0  |
| Kaydok2014     | 7  | gabapentin    | 24 | 2  |
|                | 3  | pregabalin    | 25 | 5  |
| Levendoglu2004 | 7  | gabapentin    | 20 | 0  |
|                | 1  | placebo       | 20 | 0  |
| Norrbrink2009  | 12 | tramadol      | 23 | 16 |
|                | 1  | placebo       | 12 | 2  |
| Rintala2007    | 4  | amitriptyline | 28 | 4  |
|                | 7  | gabapentin    | 26 | 5  |
|                | 1  | placebo       | 25 | 2  |
| Rintala2010    | 2  | cannabinoids  | 7  | 1  |
|                | 1  | placebo       | 5  | 1  |
| Tai2016        | 7  | gabapentin    | 7  | 0  |
|                | 1  | placebo       | 7  | 0  |

---



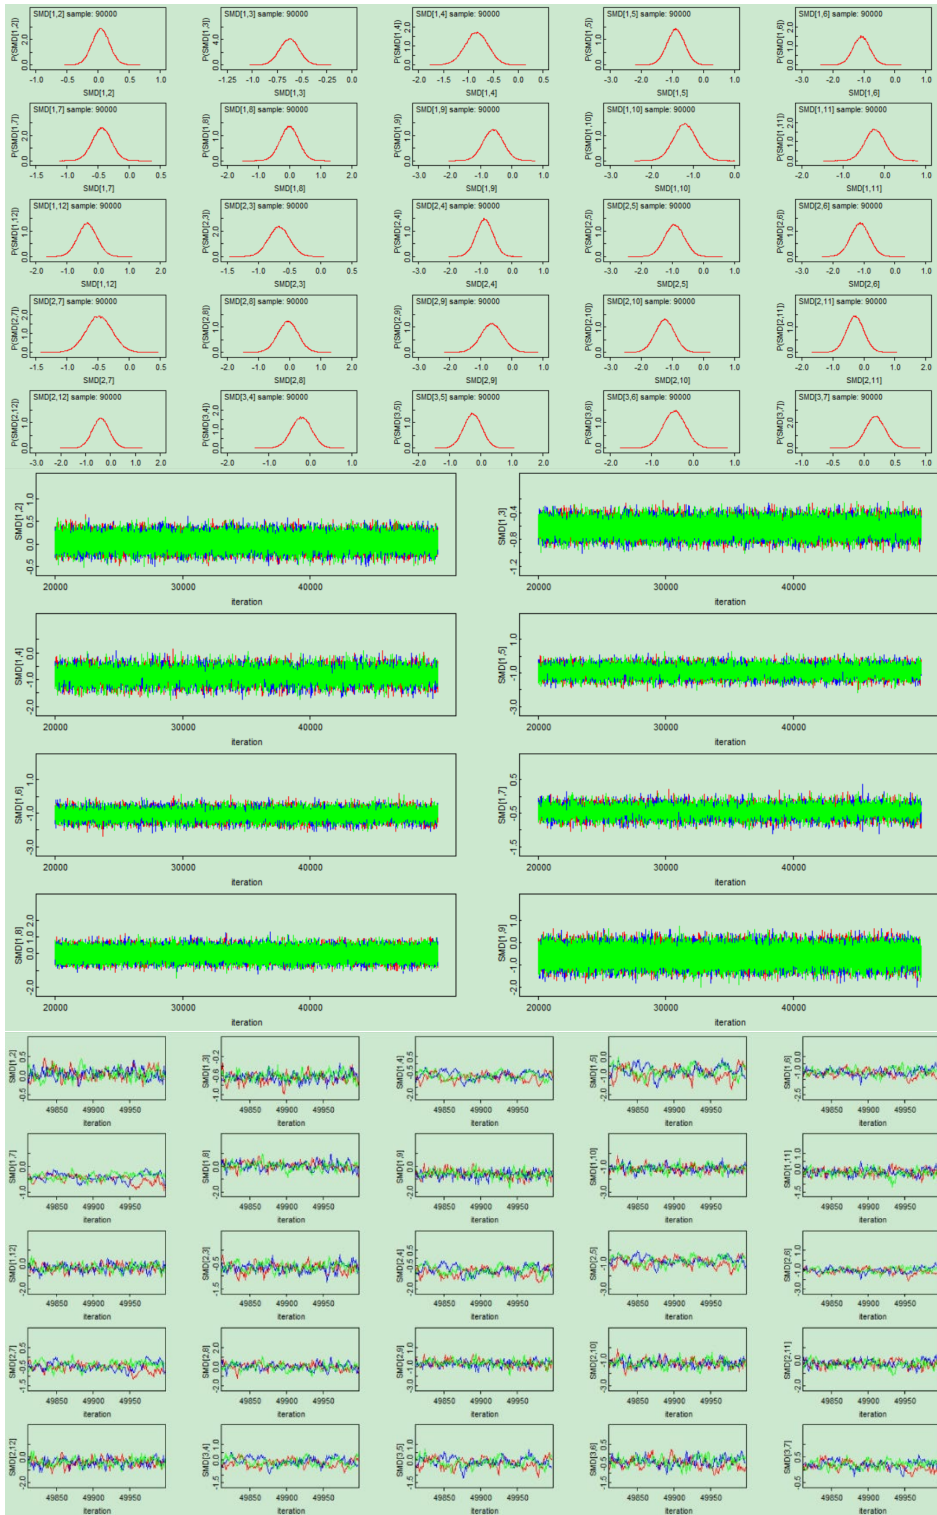

**Supplementary FIGURE 1.** The data Fitting Effect of Outcomes with Density, Trace, and History visualized via OpenBUGS.

|                | Random sequence generation (selection bias) | Allocation concealment (selection bias) | Blinding of participants and personnel (performance bias) | Blinding of outcome assessment (detection bias) | Incomplete outcome data (attrition bias) | Selective reporting (reporting bias) | Other bias |
|----------------|---------------------------------------------|-----------------------------------------|-----------------------------------------------------------|-------------------------------------------------|------------------------------------------|--------------------------------------|------------|
| Agarwal2017    | +                                           | +                                       | +                                                         | +                                               | ?                                        | +                                    | ?          |
| Amr2010        | +                                           | +                                       | +                                                         | +                                               | ?                                        | ?                                    | ?          |
| Amr2011        | +                                           | +                                       | +                                                         | +                                               | ?                                        | ?                                    | ?          |
| Andresen2016   | +                                           | +                                       | +                                                         | ?                                               | ?                                        | ?                                    | ?          |
| Cardenas2013   | +                                           | +                                       | +                                                         | +                                               | +                                        | +                                    | +          |
| Chun2019       | +                                           | +                                       | +                                                         | +                                               | ?                                        | ?                                    | ●          |
| Finnerup2009   | +                                           | +                                       | +                                                         | +                                               | +                                        | ?                                    | ?          |
| Han2016        | +                                           | +                                       | +                                                         | +                                               | +                                        | +                                    | ?          |
| Kaydok2014     | +                                           | ?                                       | +                                                         | ?                                               | +                                        | ?                                    | ?          |
| Levendoglu2004 | +                                           | +                                       | +                                                         | ?                                               | +                                        | ?                                    | ?          |
| Nct2012        | +                                           | +                                       | +                                                         | +                                               | +                                        | +                                    | +          |
| Norrbrink2009  | +                                           | +                                       | +                                                         | +                                               | +                                        | ?                                    | ?          |
| Rintala2007    | +                                           | +                                       | +                                                         | ?                                               | ?                                        | ?                                    | ?          |
| Rintala2010    | +                                           | +                                       | +                                                         | +                                               | ?                                        | ?                                    | ●          |
| Salinas2012    | +                                           | +                                       | +                                                         | +                                               | +                                        | ?                                    | ?          |
| Siddall2006    | +                                           | +                                       | +                                                         | +                                               | +                                        | ?                                    | ?          |
| Tai2016        | +                                           | +                                       | +                                                         | ?                                               | ?                                        | ?                                    | ?          |
| Vranken2008    | +                                           | +                                       | +                                                         | ?                                               | +                                        | ?                                    | ?          |
| Vranken2011    | +                                           | +                                       | +                                                         | +                                               | +                                        | +                                    | +          |
| Yilmaz2015     | +                                           | ?                                       | ?                                                         | ?                                               | +                                        | ?                                    | ?          |

Supplementary FIGURE 2. Risk of Bias Summary

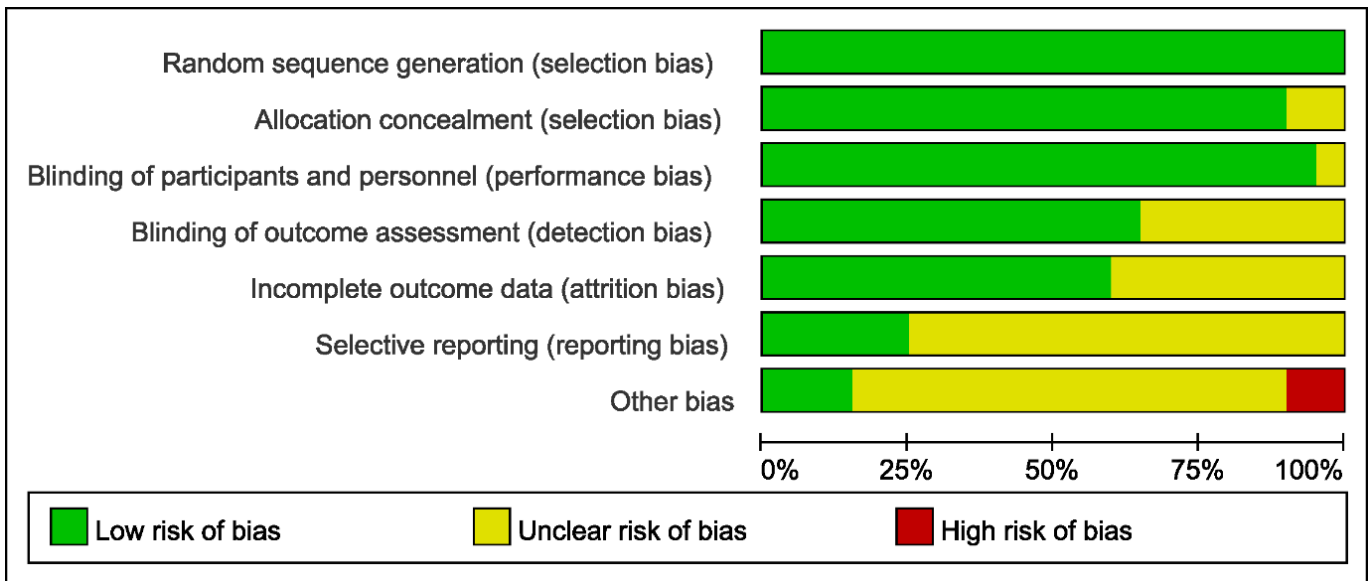

Supplementary FIGURE 3. Risk of Bias Graph.

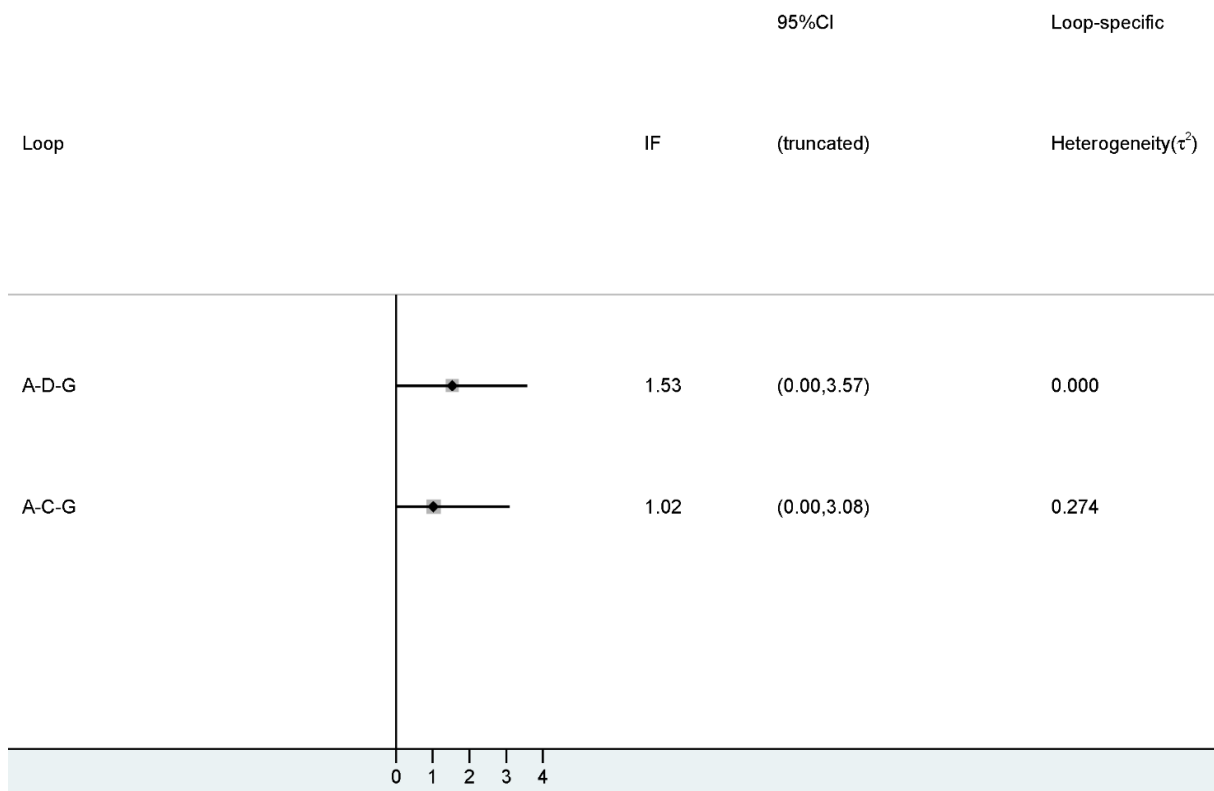

Supplementary FIGURE 4. The Node Splitting Method for Testing the Inconsistency of Primary Outcome (safety).

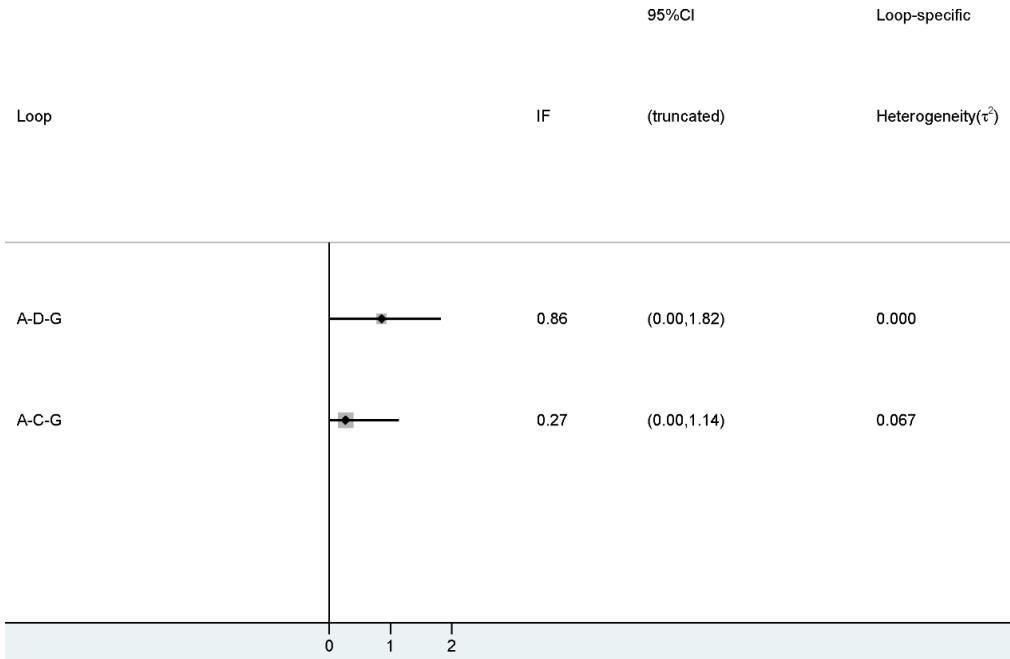

**Supplementary FIGURE 5.** The Node Splitting Method for Testing the Inconsistency of Primary Outcome (efficacy).

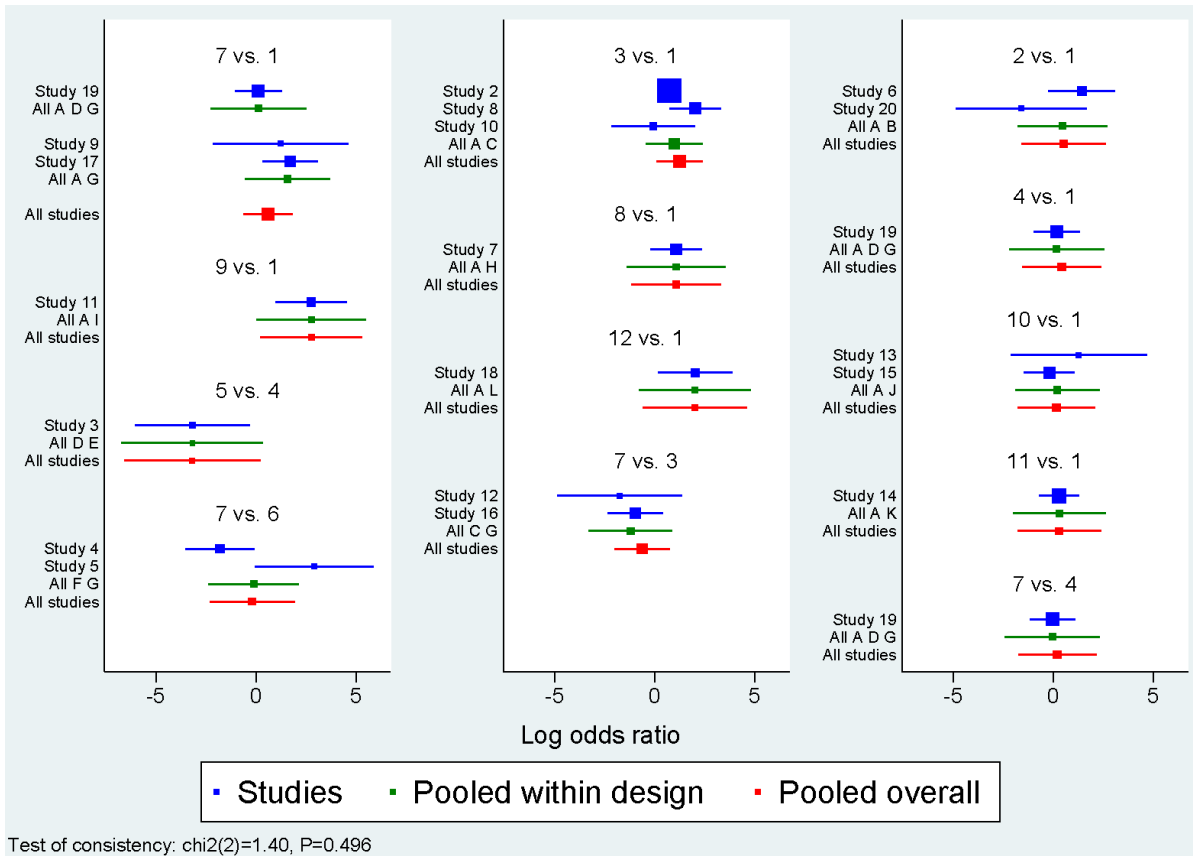

**Supplementary FIGURE 6.** Safety Pairwise and Network Meta-analysis of 11 Drugs and Placebo.

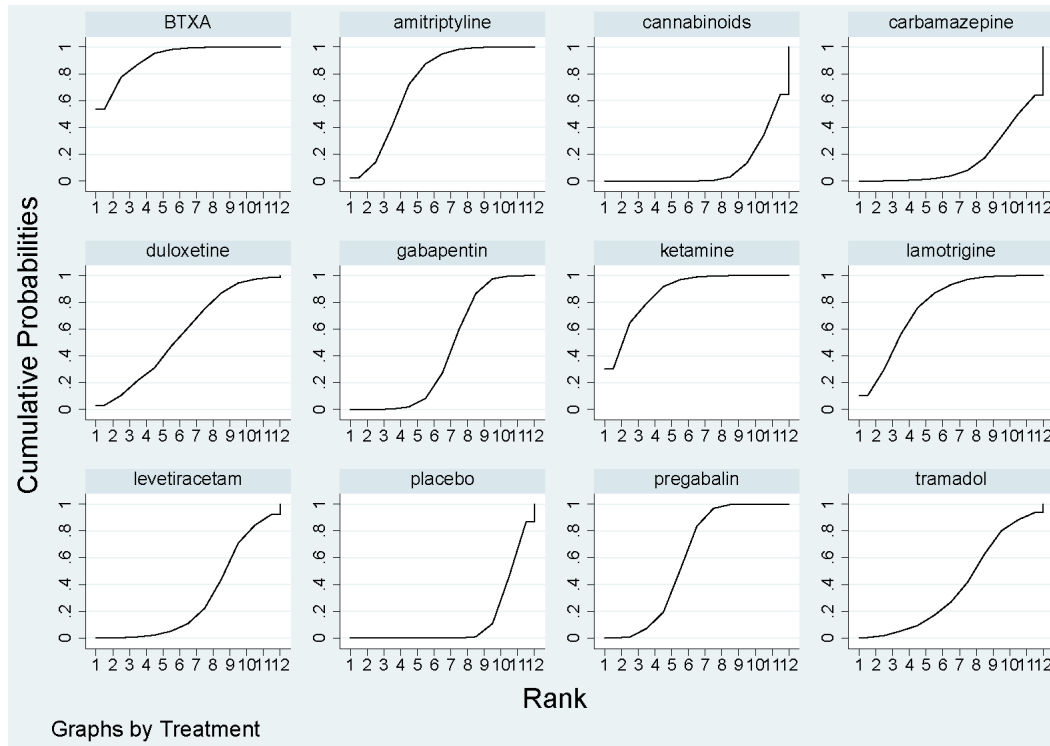

**Supplementary FIGURE 7.** The SUCRA of Primary Outcome (pain relief for around 4 weeks)

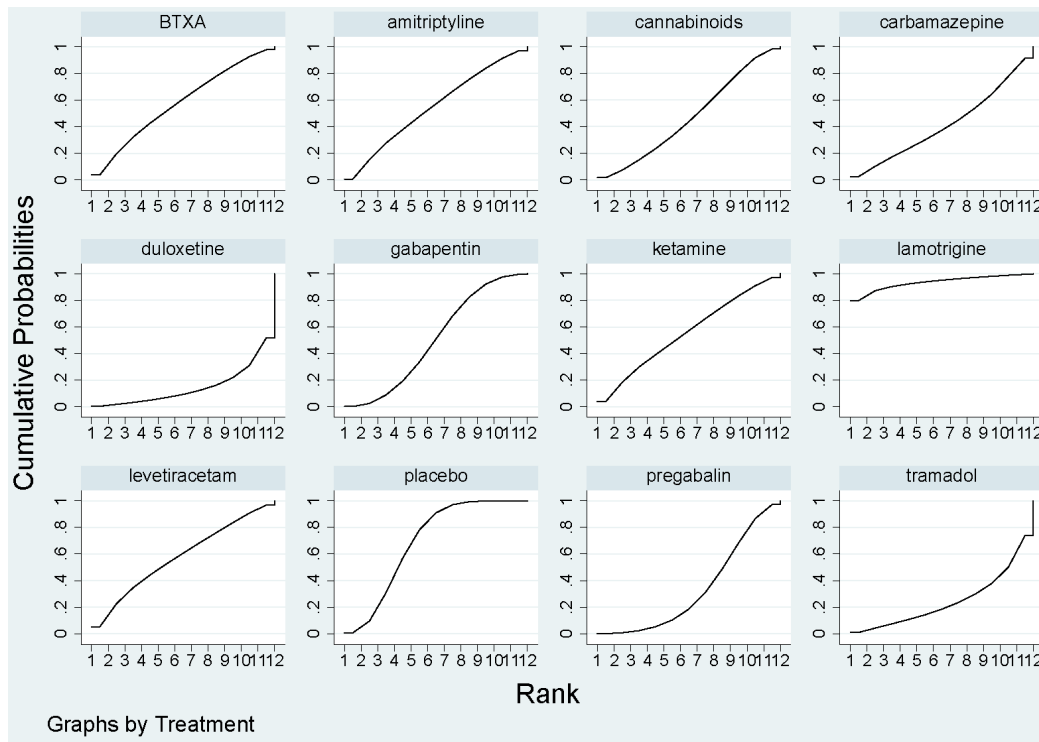

**Supplementary FIGURE 8.** The SUCRA of Primary Outcome (any adverse events).

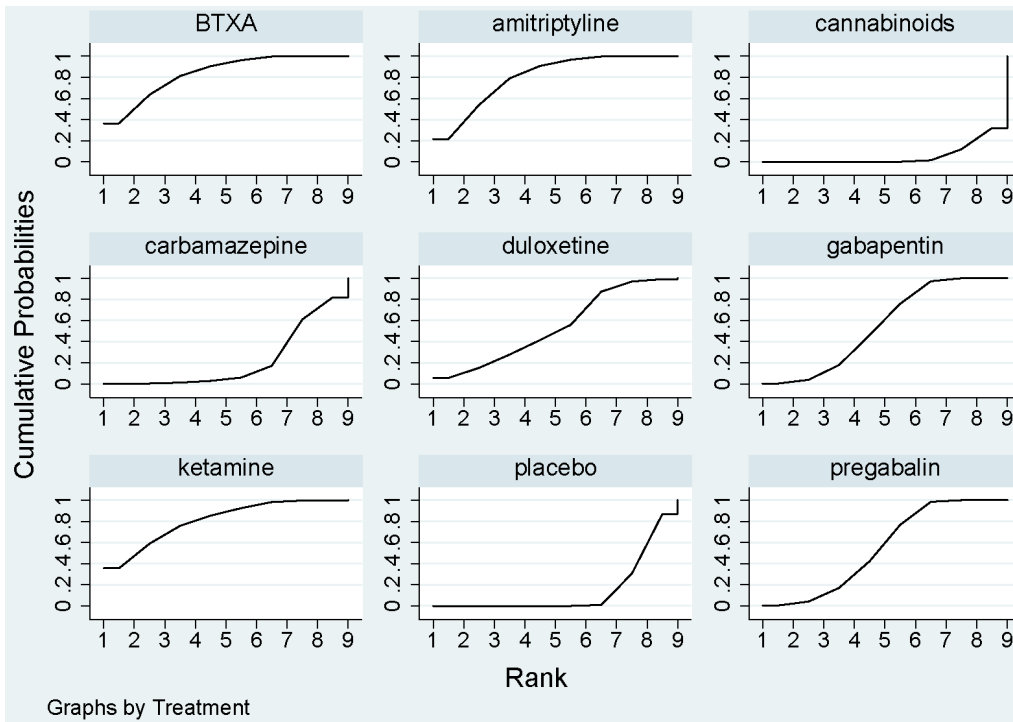

**Supplementary FIGURE 9.** The SUCRA of Secondary Outcome (pain relief for more than 8 weeks).

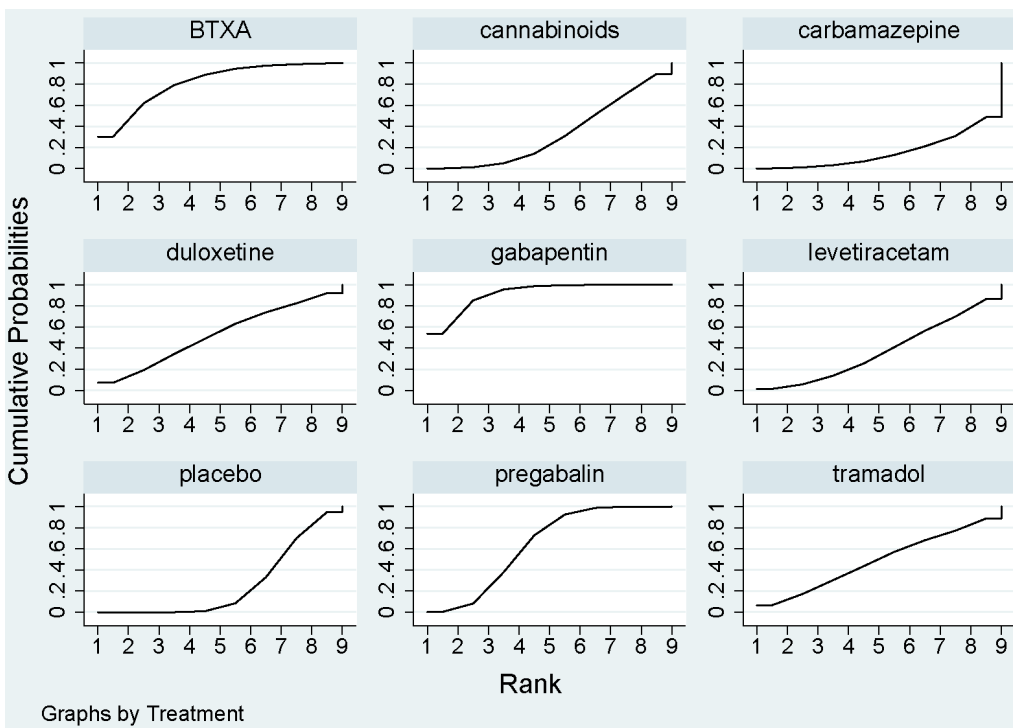

**Supplementary FIGURE 10.** The SUCRA of Secondary Outcome (mental or sleep-related symptom relief).

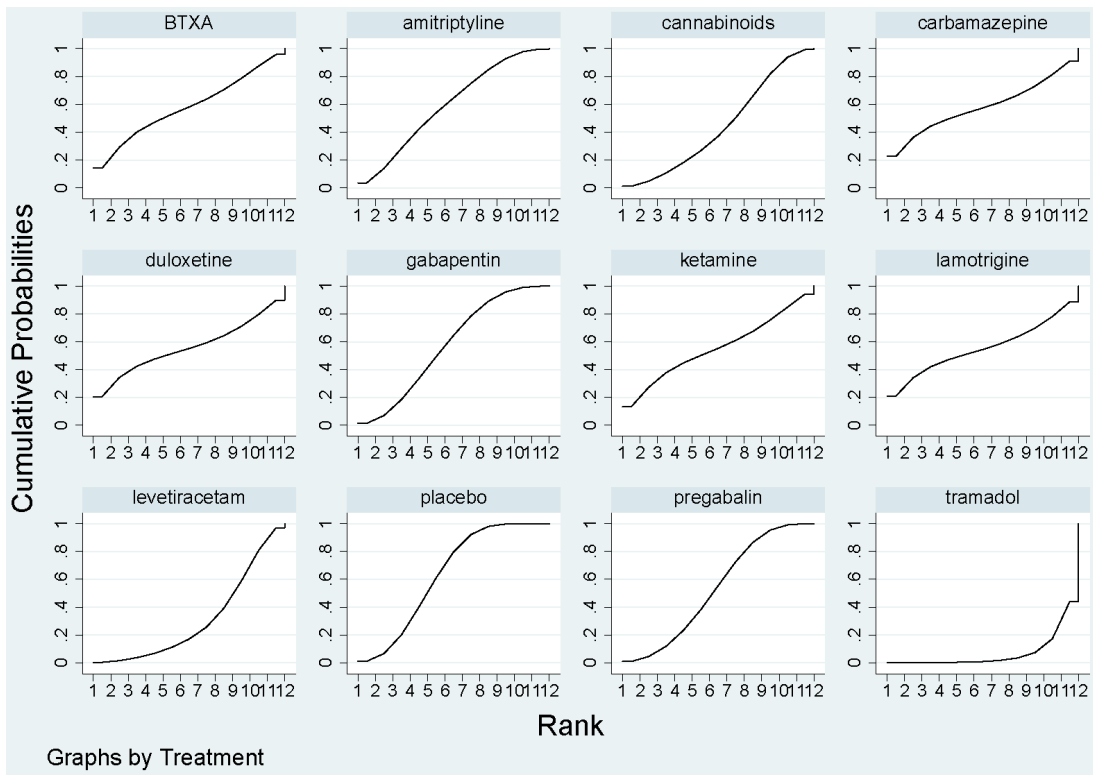

Supplementary FIGURE 21. The SUCRA of Secondary Outcome (serious adverse events).

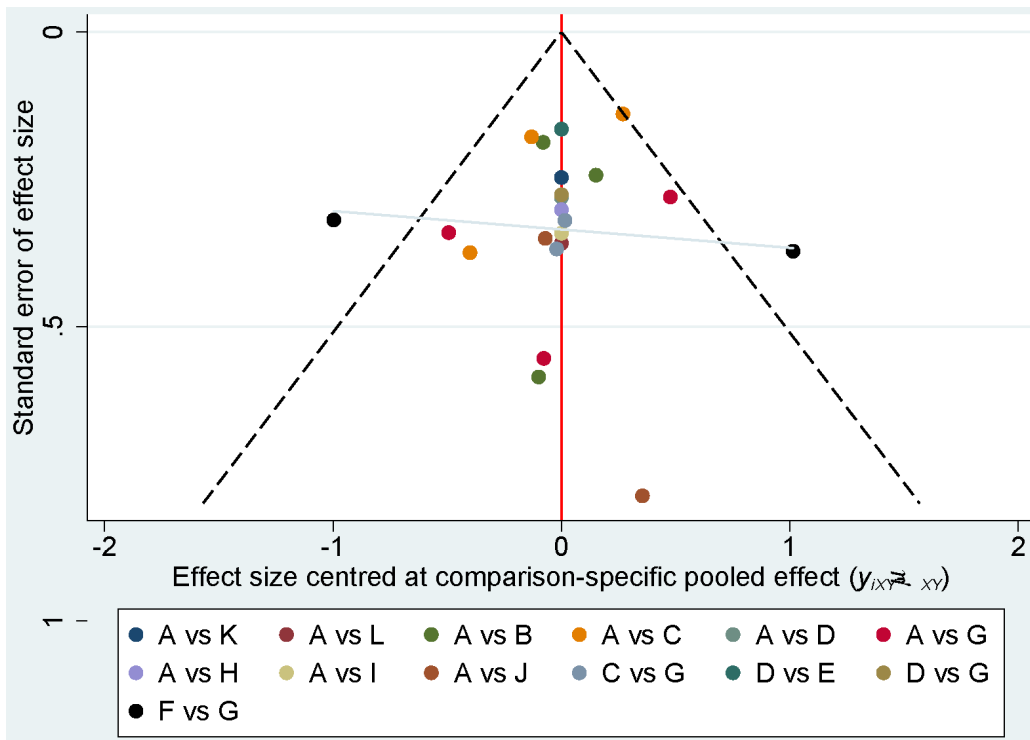

Supplementary FIGURE 32. The net-funnel of Primary Outcome-Efficacy.

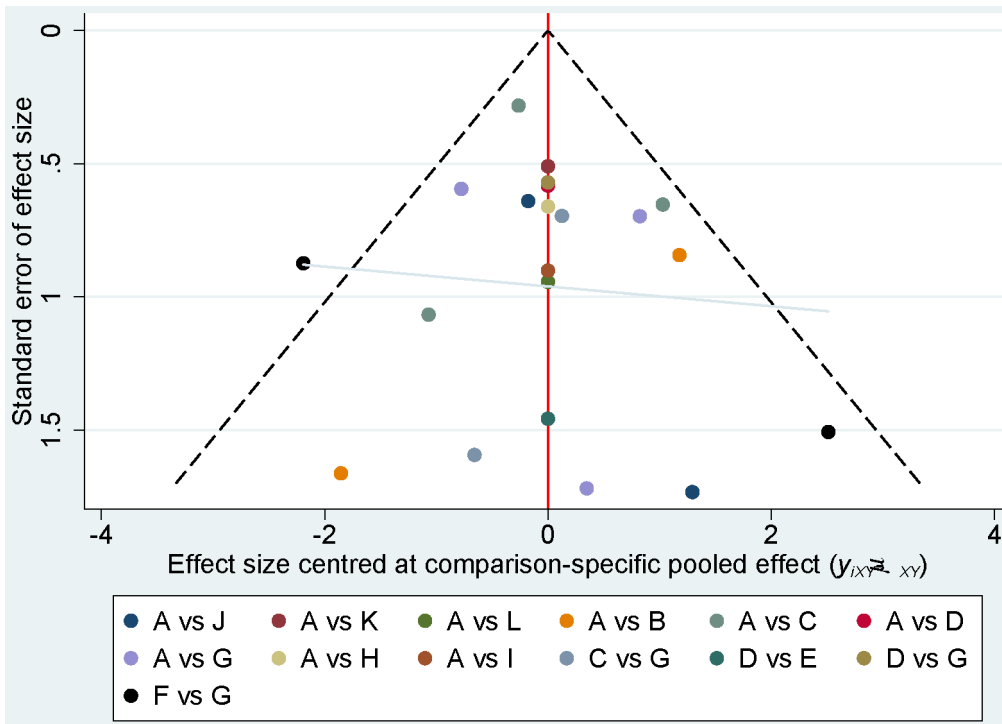

Supplementary FIGURE 43. The net-funnel of Primary Outcome-safety.
